# Supplementary material for: Potential for phenol biodegradation in cloud waters
Source: Copernicus journal article supplement (doi:10.5194/bg-15-5733-2018), 2018-09-28
Supplement: Supplementary file 1 [file bg-15-5733-2018-supplement.zip]

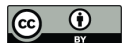

## *Supplement of*

# **Potential for phenol biodegradation in cloud waters**

**Audrey Lallement et al.**

*Correspondence to:* Anne-Marie Delort ([a-marie.delort@uca.fr](mailto:a-marie.delort@uca.fr))

- [bg-15-5733-2018-supplement-title-page.pdf](#)
- [180905 Lallement et al Biogeoscience 2018 Supplementary Material.correction.docx](#)

The copyright of individual parts of the supplement might differ from the CC BY 4.0 License.
